# Supplementary material for: Associations between multimorbidity, all-cause mortality and glycaemia in people with type 2 diabetes: A systematic review
Source: PLoS One. 2018 Dec 26;13(12):e0209585. doi: 10.1371/journal.pone.0209585 (PMC6306267; doi:10.1371/journal.pone.0209585)
Supplement: S3 Table — (XLSX) [file pone.0209585.s003.xlsx]

## Sheet: Study methods and results
Table S3 - Study methods and results
Paper	Outcome category	Outcome measure	MM measure	MM mean (SD), range (including diabetes)	Design	Follow Up	Study Period	Analysis	Reference group	Summary of results
Escalada J, Liao L, Pan C, Wang H, Bala M. Outcomes and healthcare resource utilization associated with medically attended hypoglycemia in older patients with type 2 diabetes initiating basal insulin in a US managed care setting. Current Medical Research & Opinion. 2016;32(9):1557-65.	Both: All-cause mortality Hypoglycaemic event		Charlson Comorbidity Index	1.81 (2.07)	Longitudinal cohort	Any hypoglycaemic event 1 year after insulin initiation	2007-2012	2-sample t-test for hypoglycaemic outcome, Cox proportional hazard regression for mortality outcome	n/a	Signficant association between MM and mortality. Signficant association between MM and hypoglycaemia. p<0.0001 for CCI between hypoglycaemic and no hypoglycaemic group; and non-surviving and surviving group
	Glycaemic outcome papers
Gallegos-Carrillo K, Garcia-Pena C, Duran-Munoz CA, Flores YN, Salmeron J. Relationship between social support and the physical and mental wellbeing of older Mexican adults with diabetes. Revista de Investigacion Clinica. 2009;61(5):383-91.	Fasting plasma glucose	Continuous	Condition Count	Unclear	Cross-sectional	n/a	Not stated	Mutivariable linear regression	0	No significant association with fasting plasma glucose
Abbatecola AM, Bo M, Armellini F, D'Amico F, Desideri G, Falaschi P, et al. Tighter glycemic control is associated with ADL physical dependency losses in older patients using sulfonylureas or mitiglinides: Results from the DIMORA study. Metabolism: Clinical & Experimental. 2015;64(11):1500-6.	HbA1c	3 categories: mean HbA1c of 5.9% mean HbA1c of 6.8% mean HbA1c of 8.3%	Condition Count	3.7 (1.2), range unclear	Cross-sectional	n/a	2011-2013	ANOVA comparing mean (SD) comorbidity count across HbA1c categories	n/a	No significant association with HbA1c
Bae JP, Lage MJ, Mo D, Nelson DR, Hoogwerf BJ. Obesity and glycemic control in patients with diabetes mellitus: Analysis of physician electronic health records in the US from 2009-2011. J Diabetes Complications. 2016;30(2):212-20.		4 categories: <7% ≥7% to <8% ≥8% to <9% ≥9%	Charlson Comorbidity Index	2.5 (1.9)	Cross-sectional	n/a	2009-2011	Chi-square test	n/a	MM significantly associated with reduced glycaemic control p<0.001
El-Kebbi IM, Ziemer DC, Cook CB, Miller CD, Gallina DL, Phillips LS. Comorbidity and glycemic control in patients with type 2 diabetes. Archives of Internal Medicine. 2001;161(10):1295-300.		Continuous	Chronic Disease Score	1121 (40), 232-7953	Cross-sectional	n/a	1997	Mutivariable linear regression	n/a	No significant association with HbA1c
Foran E, Hannigan A, Glynn L. Prevalence of depression in patients with type 2 diabetes mellitus in Irish primary care and the impact of depression on the control of diabetes. Irish Journal of Medical Science. 2015;184(2):319-22.		2 categories: <6.5% >6.5	Condition Count	Median 3, range unclear	Cross-sectional	n/a	Not stated	Multivariable logistic regression	Unclear	No significant association with HbA1c
Fox KM, Gerber Pharmd RA, Bolinder B, Chen J, Kumar S. Prevalence of inadequate glycemic control among patients with type 2 diabetes in the United Kingdom general practice research database: A series of retrospective analyses of data from 1998 through 2002. Clinical Therapeutics. 2006;28(3):388-95.		3 cut off categories: 6.5% 7.0% 7.5%	Condition Count	Unclear	Cross-sectional	n/a	1998 and 2002	Student t-tests and chi-square tests	n/a	No significant association with HbA1c
Frei A, Herzog S, Woitzek K, Held U, Senn O, Rosemann T, et al. Characteristics of poorly controlled Type 2 diabetes patients in Swiss primary care. Cardiovascular Diabetology. 2012;11:70.		Continuous	Condition Count	2.66 (1.6), range unclear	Cross-sectional	n/a	2010	Mutivariable linear regression	n/a	No significant association with HbA1c
Hudon C, Fortin M, Dubois MF, Almirall J. Comorbidity and glycemia control among patients with type 2 diabetes in primary care. Diabetes, Metabolic Syndrome and Obesity Targets and Therapy. 2008;1:33-7.		2 categories: <7% ≥7%	Cumulative Illness Rating Scale	9.26, range unclear	Cross-sectional	n/a	2004-2006	t-test and multivariable logistic regression	n/a	No significant association with HbA1c
Luijks H, Biermans M, Bor H, van Weel C, Lagro-Janssen T, de Grauw W, et al. The Effect of Comorbidity on Glycemic Control and Systolic Blood Pressure in Type 2 Diabetes: A Cohort Study with 5 Year Follow-Up in Primary Care. PLoS ONE [Electronic Resource]. 2015;10(10):e0138662.		Continous	Condition Count	2.8 (2.3), 0-12	Cohort	5 years	1985-2006	Linear regression	n/a	No significant association with HbA1c
Mosen DM, Glauber H, Stoneburner AB, Feldstein AC. Assessing the association between medication adherence and glycemic control. American Journal of Pharmacy Benefits. 2017;9(3):82-8.		2 categories: <8% >9%	Charlson Comorbidity Index	2.3	Cross-sectional	n/a	2014-2015	Multivariable logistic regression	<8	No significant association with HbA1c
Pollack M, Chastek B, Williams SA, Moran J. Impact of treatment complexity on adherence and glycemic control: an analysis of oral antidiabetic agents. Journal of Clinical Outcomes Management. 2010;17(6):257-65.		2 categories: <7% ≥7%	Charlson Comorbidity Index	Unclear	Cohort	1 year	2001-2006	Multivariable logistic regression	<7	MM significantly associated with reduced glycaemic control Every unit increase in CCI had OR of 0.86 of achieving glycaemic target (HbA1c<7%). p<0.01
Romero SP, Garcia-Egido A, Escobar MA, Andrey JL, Corzo R, Perez V, et al. Impact of new-onset diabetes mellitus and glycemic control on the prognosis of heart failure patients: a propensity-matched study in the community. International Journal of Cardiology. 2013;167(4):1206-16.		2 categories: <7% ≥7%	Charlson Comorbidity Index	3.1	Cohort	mean 4.73 years	2001-2009	Chi-square tests and independent sample t-tests	n/a	No significant association with HbA1c
Svensson E, Baggesen LM, Thomsen RW, Lyngaa T, Pedersen L, Norrelund H, et al. Patient-level predictors of achieving early glycaemic control in Type 2 diabetes mellitus: a population-based study. Diabetic Medicine. 2016;33(11):1516-23.		2 categories: <7% ≥7%	Charlson Comorbidity Index	Unclear	Cohort	3-6months	2000-2012	Poisson regression	1	MM associated with reduced glycaemic control. CCI of ≥ 3 had a RR of 0.94 of achieving glycaemic target (HbA1c<7%). p-value unclear
Teljeur C, Smith SM, Paul G, Kelly A, O'Dowd T. Multimorbidity in a cohort of patients with type 2 diabetes. Eur J Gen Pract. 2013;19(1):17-22.		Continuous	Condition Count	Unclear	Cross-sectional	n/a	2006-2007	Mutivariable linear regression	n/a	No significant association with HbA1c
Walker RJ, Smalls BL, Egede LE. Social determinants of health in adults with type 2 diabetes--Contribution of mutable and immutable factors. Diabetes Research & Clinical Practice. 2015;110(2):193-201.		Continuous	Charlson Comorbidity Index	25.7	Cross-sectional	n/a	Not stated	Mutivariable linear regression	n/a	MM significantly associated with reduced glycaemic control. Every unit increase of CCI had β of -0.09. p<0.05
Abbatecola AM, Bo M, Barbagallo M, Incalzi RA, Pilotto A, Bellelli G, et al. Severe hypoglycemia is associated with antidiabetic oral treatment compared with insulin analogs in nursing home patients with type 2 diabetes and dementia: results from the DIMORA study. Journal of the American Medical Directors Association. 2015;16(4):349.e7-12.	Hypoglycaemic event		Condition Count	3.4 (1.3), 0-12	Cohort study	mean 3.1 years length of stay - hypoglycaemic event during length of stay	2011-2013	Chi-square	n/a	MM significantly associated with risk of hypoglycaemic event. p=0.002
Fonseca V, Chou E, Chung HW, Gerrits C. Economic burden of hypoglycemia with basal insulin in type 2 diabetes. American Journal of Managed Care. 2017;23(2):114-22.			Charlson Comorbidity Index	3.1	Cohort study	hypoglycaemic event within 1 and 2 years	2007-2014	t-test	n/a	MM significantly associated with risk of hypoglycaemic event. p<0.001 for CCI between hypoglycaemic and no hypoglycaemic group.
Kim HM, Seong JM, Kim J. Risk of hospitalization for hypoglycemia among older Korean people with diabetes mellitus: Interactions between treatment modalities and comorbidities. Medicine. 2016;95(42):e5016.			Charlson Comorbidity Index	3.3 (2)	Cross-sectional	n/a	2013	Multivariable logistic regression	1	MM significantly associated with risk of hypoglycaemic event. OR: 1(reference): 1; 2: 1.31; 3: 1.81; 4: 2.49; 5+: 4.8 p<0.01
Kostev K, Dippel FW, Rathmann W. Predictors of hypoglycaemia in insulin-treated type 2 diabetes patients in primary care: a retrospective database analysis. Primary Care Diabetes. 2014;8(2):127-31.			Charlson Comorbidity Index	2.3 (1.5)	Cohort study	Hypoglycaemic event within 1 year	2011-2012	Multivariable logistic regression	MM treated as continous	MM significantly associated with risk of hypoglycaemic event. OR (95%CI) for CCI: 1.06 (1.04-1.08) p<0.0001
McCoy RG, Van Houten HK, Ziegenfuss JY, Shah ND, Wermers RA, Smith SA. Self-report of hypoglycemia and health-related quality of life in patients with type 1 and type 2 diabetes. Endocrine Practice. 2013;19(5):792-9.			Charlson Comorbidity Index	2.1 (1.9)	Cross-sectional	n/a	2005-2006	t-test	n/a	No significant association with hypoglycaemia
Quilliam BJ, Simeone JC, Ozbay AB. Risk factors for hypoglycemia-related hospitalization in patients with type 2 diabetes: a nested case-control study. Clinical Therapeutics. 2011;33(11):1781-91.			Charlson Comorbidity Index	0.52	Nested case control	Hypoglycaemic event within 180 days	2004-2008	Multivariable logistic regression	Treated as continuous	MM significantly associated with risk of hypoglycaemic event. OR (95%CI) for CCI: 1.37 (1.32-1.44) p-value unclear
Rathmann W, Kostev K, Gruenberger JB, Dworak M, Bader G, Giani G. Treatment persistence, hypoglycaemia and clinical outcomes in type 2 diabetes patients with dipeptidyl peptidase-4 inhibitors and sulphonylureas: a primary care database analysis. Diabetes, Obesity & Metabolism. 2013;15(1):55-61.			Charlson Comorbidity Index	1.64	Cohort study	Hypoglycaemic event within 2 years	2007-2010	Multivariable logistic regression	Treated as continuous	MM significantly associated with risk of hypoglycaemic event. OR for CCI: 1.14 p<0.05
Signorovitch JE, Macaulay D, Diener M, Yan Y, Wu EQ, Gruenberger JB, et al. Hypoglycaemia and accident risk in people with type 2 diabetes mellitus treated with non-insulin antidiabetes drugs. Diabetes, Obesity & Metabolism. 2013;15(4):335-41.			Charlson Comorbidity Index	1.2	Cohort study	mean 3.28 years	1998-2010	Wilcoxon rank-sum tests	n/a	MM significantly associated with risk of hypoglycaemic event. p<0.001 for CCI between hypoglycaemic and no hypoglycaemic group.
Yu HC, Tsai WC, Kung PT. Does the pay-for-performance programme reduce the emergency department visits for hypoglycaemia in type 2 diabetic patients? Health Policy & Planning. 2014;29(6):732-41.			Charlson Comorbidity Index	Unclear	Cohort study	Hypoglycaemic event within the study period	2001-2009	Cox proportional hazard regression	0	MM significantly associated with risk of hypoglycaemic event. HR: 0 (reference): 1; 1: 1.04; 2: 1.22; 3: 1.16; 4: 1.34; 5+: 1.38 p<0.001
Castro-Rodriguez M, Carnicero JA, Garcia-Garcia FJ, Walter S, Morley JE, Rodriguez-Artalejo F, et al. Frailty as a Major Factor in the Increased Risk of Death and Disability in Older People With Diabetes. Journal of the American Medical Directors Association. 2016;17(10):949-55.	All-cause mortality		Charlson Comorbidity Index	Unclear	Cohort	5.5 years	2006-2009	Cox proportional hazard regression	MM treated as continous	No significant association with mortality
Greenfield S, Billimek J, Pellegrini F, Franciosi M, De Berardis G, Nicolucci A, et al. Comorbidity affects the relationship between glycemic control and cardiovascular outcomes in diabetes: a cohort study. Annals of Internal Medicine. 2009;151(12):854-60.			Total Illness Burden Index	Unclear	Cohort	5 years	1999-2004	Cox proportional hazard regression	MM treated as continous	MM significantly associated with mortality. 2% increase in mortality per unit of TIBI score. p=0.014
Huang YQ, Gou R, Diao YS, Yin QH, Fan WX, Liang YP, et al. Charlson comorbidity index helps predict the risk of mortality for patients with type 2 diabetic nephropathy. Journal of Zhejiang University SCIENCE B. 2014;15(1):58-66.			Charlson Comorbidity Index	2.9 (1.7)	Cohort	Median follow-up not stated. Survival rates calculated for 3 and 5 years	2003-2010	Multivariable logistic regression	CCI 1-2	MM significantly associated with mortality OR for CCI: 1-2 (reference): 1; 3-4: 1.93; 5+: 5.46 p=0.003
Hunt KJ, Gebregziabher M, Lynch CP, Echols C, Mauldin PD, Egede LE. Impact of diabetes control on mortality by race in a national cohort of veterans. Annals of Epidemiology. 2013;23(2):74-9.			Condition Count	Unclear	Cohort	4.4 years	2002-2006	Cox proportional hazard regression	0 count	MM significantly associated with mortality HR for condition count: 0 (reference): 1; 1: 1.80; 2: 2.65; 3+: 3.78 p-value unclear
Kheirbek RE, Alemi F, Zargoush M. Comparative effectiveness of hypoglycemic medications among veterans. Journal of Managed Care Pharmacy. 2013;19(9):740-4.			Severity of Illness	0.167, 0-1	Cohort	Unclear	1998-2010	Multivariable logistic regression	Unclear	MM significantly associated with mortality OR for severity of illness score: unclear p<0.0001
Lin WH, Hsu CH, Chen HF, Liu CC, Li CY. Mortality of patients with type 2 diabetes in Taiwan: a 10-year nationwide follow-up study. Diabetes Research & Clinical Practice. 2015;107(1):178-86.			Charlson Comorbidity Index	4.4 (3.1)	Cohort	At least 1 year	2000-2009	Cox proportional hazard regression	CCI 0-2	MM significantly associated with mortality HR for CCI: 0-2 (reference): 1; 3-4: 1.4; 5+: 2.51 p<0.001
Lynch CP, Gebregziabher M, Zhao Y, Hunt KJ, Egede LE. Impact of medical and psychiatric multi-morbidity on mortality in diabetes: emerging evidence. BMC endocrine disorders. 2014;14:68.			Condition Count	Unclear	Cohort	4 years	2002-2006	Cox proportional hazard regression	0 count	MM significantly associated with mortality
Martin WG, Galligan J, Simpson S, Jr., Greenaway T, Burgess J. Admission blood glucose predicts mortality and length of stay in patients admitted through the emergency department. Internal Medicine Journal. 2015;45(9):916-24.			Condition Count	Unclear	Cohort	90 days	2012	Multivariable logistic regression	0 count	MM significantly associated with mortality Relative risk for condition count: 0 (reference): 1; 1: 1.54; 2: 5.34; 3: 6.94; 4: 17.4; 5+: 17.8 p<0.05
McEwen LN, Karter AJ, Waitzfelder BE, Crosson JC, Marrero DG, Mangione CM, et al. Predictors of mortality over 8 years in type 2 diabetic patients: Translating Research Into Action for Diabetes (TRIAD). Diabetes care. 2012;35(6):1301-9.			Charlson Comorbidity Index	Unclear	Cohort	6.2 years	2001-2007	Cox proportional hazard regression	<1	MM significantly associated with mortality HR for CCI: <1 (reference): 1; 1-<2: 1.44; 2-<3: 1.80; 4+ 2.61 p-value unclear
Monami M, Lambertucci L, Lamanna C, Lotti E, Marsili A, Masotti G, et al. Are comorbidity indices useful in predicting all-cause mortality in Type 2 diabetic patients? Comparison between Charlson index and disease count. Aging-Clinical & Experimental Research. 2007;19(6):492-6.			Charlson Comorbidity Index and Condition Count	2.8(1.6); 1.9 (1.0), 0-9	Cohort	3 years	1993-1997	Cox proportional hazard regression	MM treated as continous	MM significantly associated with mortality. HR for CCI: 1.31 HR for condition count: 1.54 p-value unclear
Monami M, Luzzi C, Lamanna C, Chiasserini V, Addante F, Desideri CM, et al. Three-year mortality in diabetic patients treated with different combinations of insulin secretagogues and metformin. Diabetes/Metabolism Research Reviews. 2006;22(6):477-82.			Charlson Comorbidity Index	2.8 (1.6)	Cohort	3 years	2002-2005	Cox proportional hazard regression	MM treated as continous	MM significantly associated with mortality. HR for CCI: 1.22 p<0.0001
Walker J, Halbesma N, Lone N, McAllister D, Weir CJ, Wild SH, et al. Socioeconomic status, comorbidity and mortality in patients with type 2 diabetes mellitus in Scotland 2004-2011: a cohort study. Journal of Epidemiology & Community Health. 2016;70(6):596-601.			Charlson Comorbidity Index, Elixhauser Comorbidity Index and Condition Count	Unclear	Cohort	1 year	2004-2012	Multivariable logistic regression		No significant association with mortality
Wang CP, Lorenzo C, Espinoza SE. Frailty Attenuates the Impact of Metformin on Reducing Mortality in Older Adults with Type 2 Diabetes. Journal of Endocrinology Diabetes & Obesity. 2014;2(2).			Charlson Comorbidity Index	2.07	Cohort	5.30 years	1999-2006	Cox proportional hazard regression	MM treated as continous	MM significantly associated with mortality HR for CCI: 1.28 p<0.001
Weir DL, McAlister FA, Majumdar SR, Eurich DT. The Interplay Between Continuity of Care, Multimorbidity, and Adverse Events in Patients With Diabetes. Medical care. 2016;54(4):386-93.			Condition Count	Unclear	Cohort	3 years	2004-2009	Multivariable logistic regression	0 count	MM significantly associated with mortality OR for condition count: 0 (reference): 1; 1+: 1.26 p<0.001
Wilke T, Mueller S, Groth A, Berg B, Hammar N, Tsai K, et al. Effectiveness of sulphonylureas in the therapy of diabetes mellitus type 2 patients: an observational cohort study. Journal of Diabetes & Matabolic Disorders. 2015;15:28.			Charlson Comorbidity Index	1.41	Cohort	374.0 days	2010-2011	Cox proportional hazard regression	MM treated as continous	MM significantly associated with mortality. HR for CCI: 1.95 p<0.001
Zelada H, Bernabe-Ortiz A, Manrique H. Inhospital Mortality in Patients with Type 2 Diabetes Mellitus: A Prospective Cohort Study in Lima, Peru. Journal of Diabetes Research. 2016;2016:7287215.			Condition Count	Unclear	Cohort	100 days	2012	Cox proportional hazard regression	1 count	MM significantly associated with mortality HR for condition count: 1 (reference): 1; 2: 7.75; 3+: 21.12 p-value unclear
